# Supplementary material for: Cross‐modal embedding integrator for disease‐gene/protein association prediction using a multi‐head attention mechanism
Source: PubMed Central journal article supplement — Pharmacol Res Perspect. 2024 Nov 19;12(6):e70034. doi: 10.1002/prp2.70034 (PMC11574662; doi:10.1002/prp2.70034), 2024-11-19
Supplement: PRP2-12-e70034-s001.pdf [file PRP2-12-e70034-s001.pdf]

```
import os

import torch

os.environ['TORCH'] = torch.__version__

from torch import Tensor

import torch.nn as nn

from torch.nn import Linear, MultiheadAttention, Dropout, Sigmoid, ReLU, Parameter,
ModuleList, BCELoss

import torch.optim as optim

from torch.optim import Adam, AdamW

from torch.optim.lr_scheduler import ReduceLROnPlateau

from torch.utils.data import TensorDataset, DataLoader

import numpy as np

import pandas as pd

import copy

from copy import deepcopy

import sklearn.metrics

from sklearn.metrics import roc_curve, auc, roc_auc_score, precision_recall_curve,
accuracy_score, precision_score, recall_score, f1_score

import matplotlib.pyplot as plt

import random

import time

emb_dim = 1536

num_heads = 32

dro = 0.3

lin_dim = 2048
```

```
num_layers = 1
```

```
output_dim = 1
```

```
class Predictor(nn.Module):
```

```
    def __init__(self, emb_dim, num_heads, dro, lin_dim):
```

```
        super(Predictor, self).__init__()
```

```
        self.mha_attention = nn.MultiheadAttention(emb_dim, num_heads, dropout=dro)
```

```
        self.linear1 = nn.Linear(emb_dim, lin_dim)
```

```
        self.linear2 = nn.Linear(lin_dim, emb_dim)
```

```
        self.relu = nn.ReLU()
```

```
        self.dropout1 = nn.Dropout(dro)
```

```
        self.dropout2 = nn.Dropout(dro)
```

```
        self.dropout3 = nn.Dropout(dro)
```

```
        self.layer_norm1 = nn.LayerNorm(emb_dim)
```

```
        self.layer_norm2 = nn.LayerNorm(emb_dim)
```

```
    def forward(self, x):
```

```
        mha_output, _ = self.mha_attention(x, x, x)
```

```
        x = self.layer_norm1(x + self.dropout1(mha_output))
```

```
        lin_output = self.linear1(x)
```

```
        lin_output = self.relu(lin_output)
```

```
        lin_output = self.dropout2(lin_output)
```

```
        lin_output = self.linear2(lin_output)
```

```
        x = self.layer_norm2(x + self.dropout3(lin_output))
```

```
        return x
```

```

class PredictorModel(nn.Module):

    def __init__(self, emb_dim, num_heads, dro, lin_dim, num_layers, output_dim):

        super(PredictorModel, self).__init__()

        self.positional_encoding = nn.Parameter(torch.zeros(1, 4, emb_dim))

        self.predictors = nn.ModuleList([

            Predictor(emb_dim, num_heads, dro, lin_dim) for _ in range(num_layers)

        ])

        self.dropout1a = nn.Dropout(dro)

        self.linear1a = nn.Linear(emb_dim, output_dim)

        self.sigmoid = nn.Sigmoid()

    def forward(self, A, B, C, D):

        x = torch.cat((A, B, C, D), dim=1)

        x = x.view(x.size(0), 4, -1)

        x = x + self.positional_encoding[:, :x.size(1), :]

        x = x.permute(1, 0, 2)

        x = self.dropout1a(x)

        for predictor in self.predictors:

            x = predictor(x)

        x = x.permute(1, 0, 2)

        x = self.linear1a(x[:, 3, :])

        x = self.sigmoid(x)

        return x

```
